# Supplementary material
Source: Research Square preprint supplement (doi:10.21203/rs.3.rs-10052084/v1)
Supplement: Supplementary file 1 [file 57d7ce0b00047257b5d80e0c.docx]

**Highlights**

 Thermal runaway of 15 Ah LFP batteries is characterized at different rates.

 Multi-parameter monitoring reveals electro-thermo-mechanical-gas coupling during thermal runaway.

 Temperature rise and heat release scale non-linearly with overcharge rates.

 Higher overcharge rates shorten runaway onset and exacerbate hazard severity.
